# Supplementary material
Source: publisher site journal article supplement (https://www.dovepress.com/article/449694)
Supplement: Supplementary file 1 [file get_supplementary_file.php]

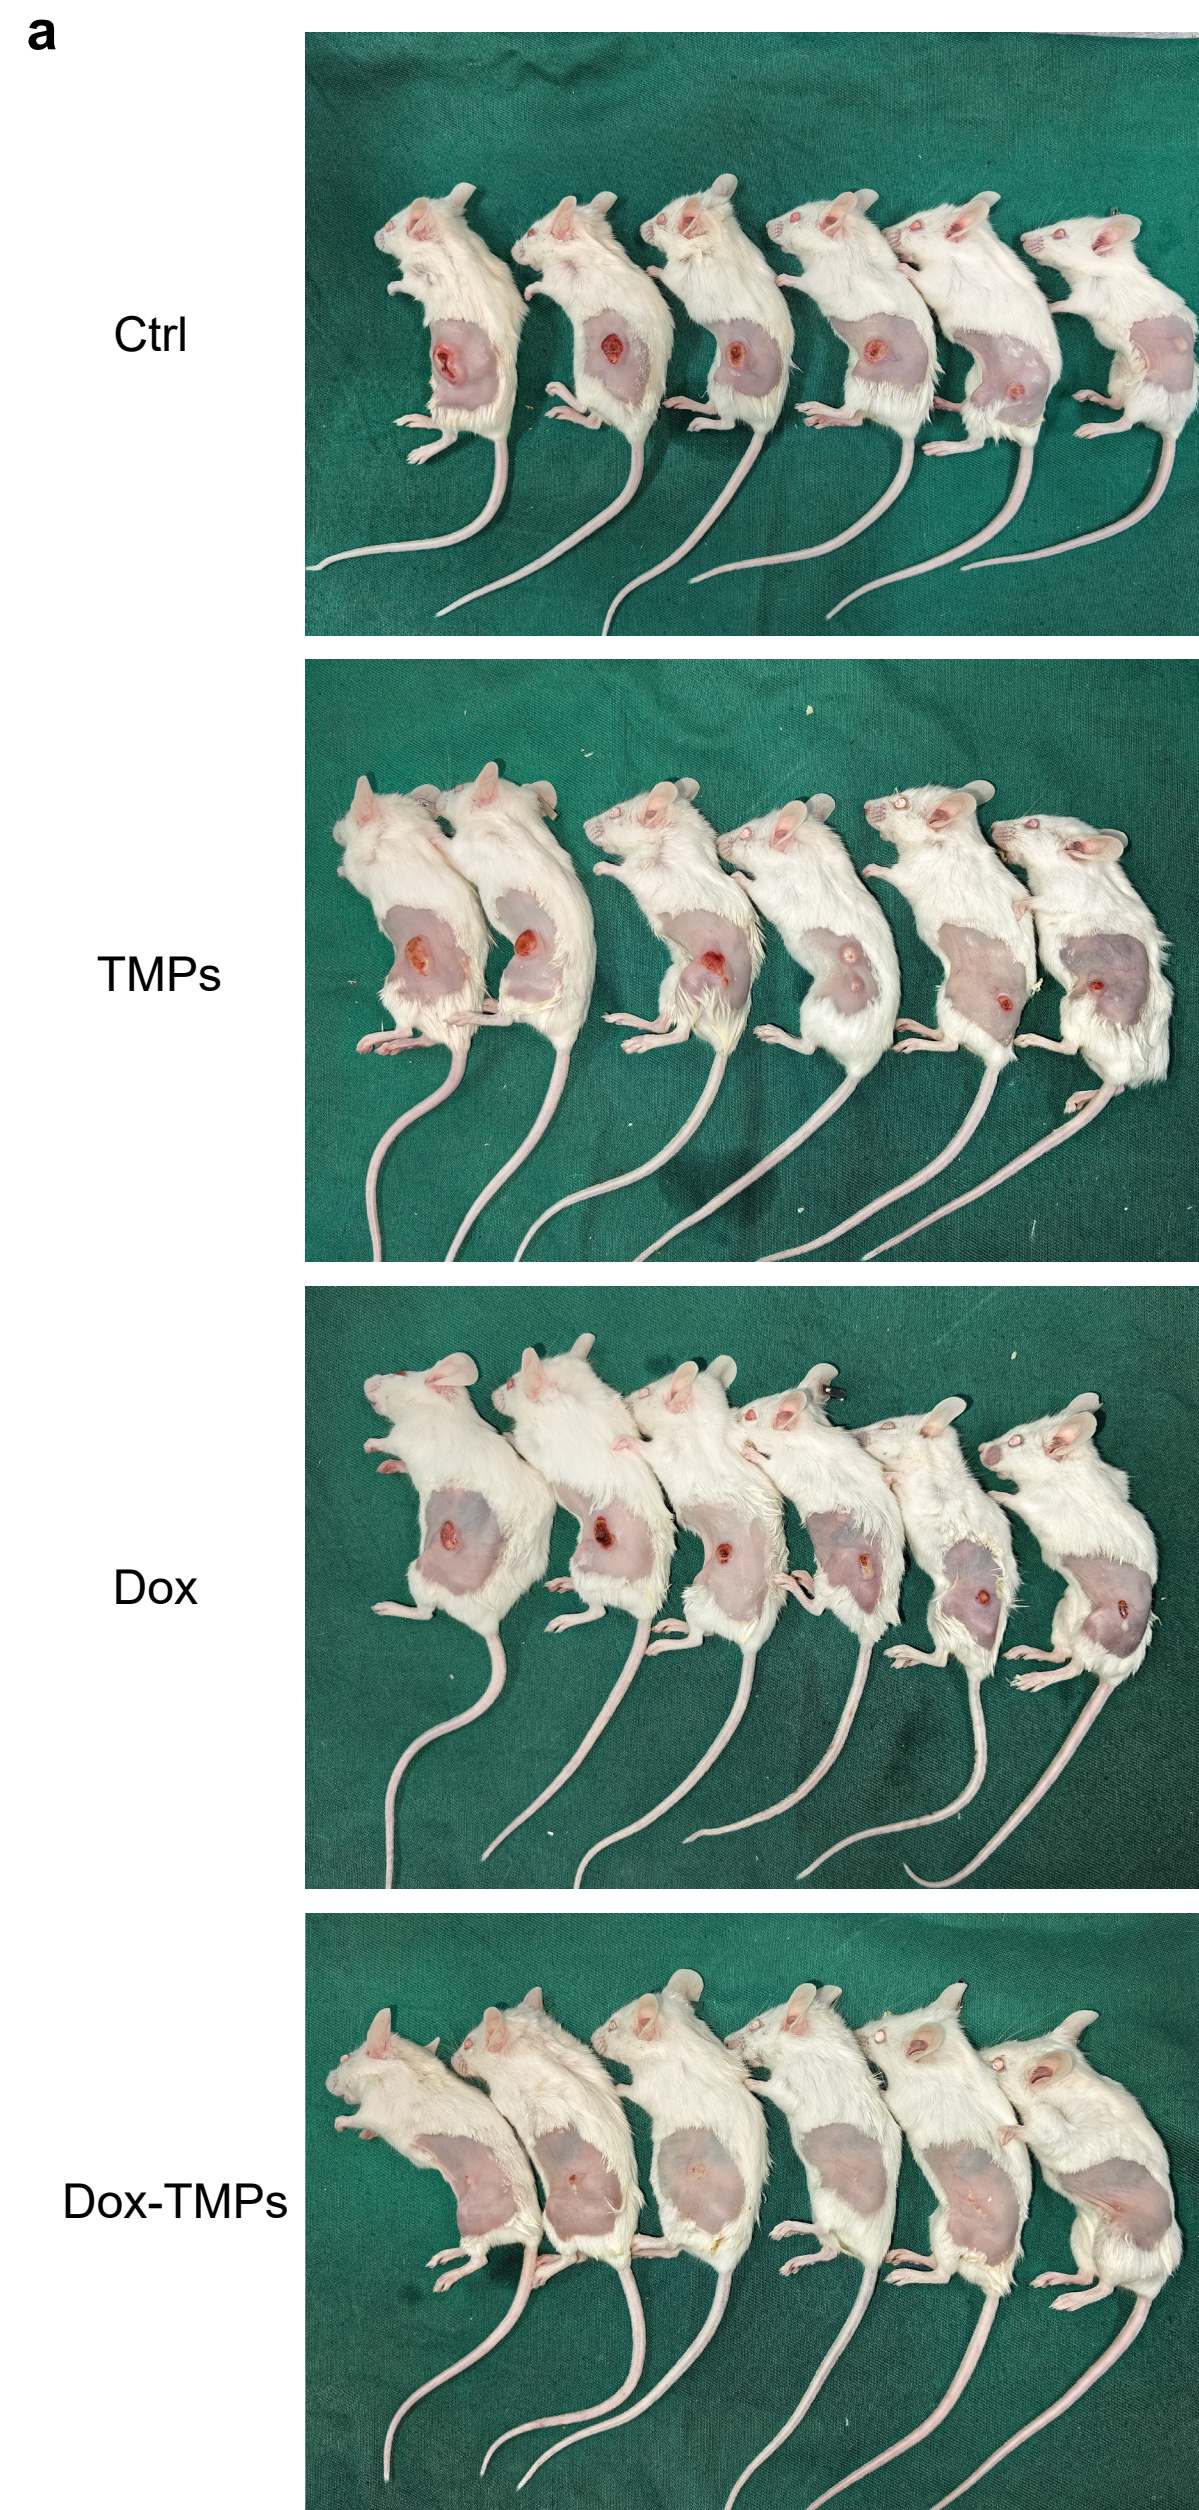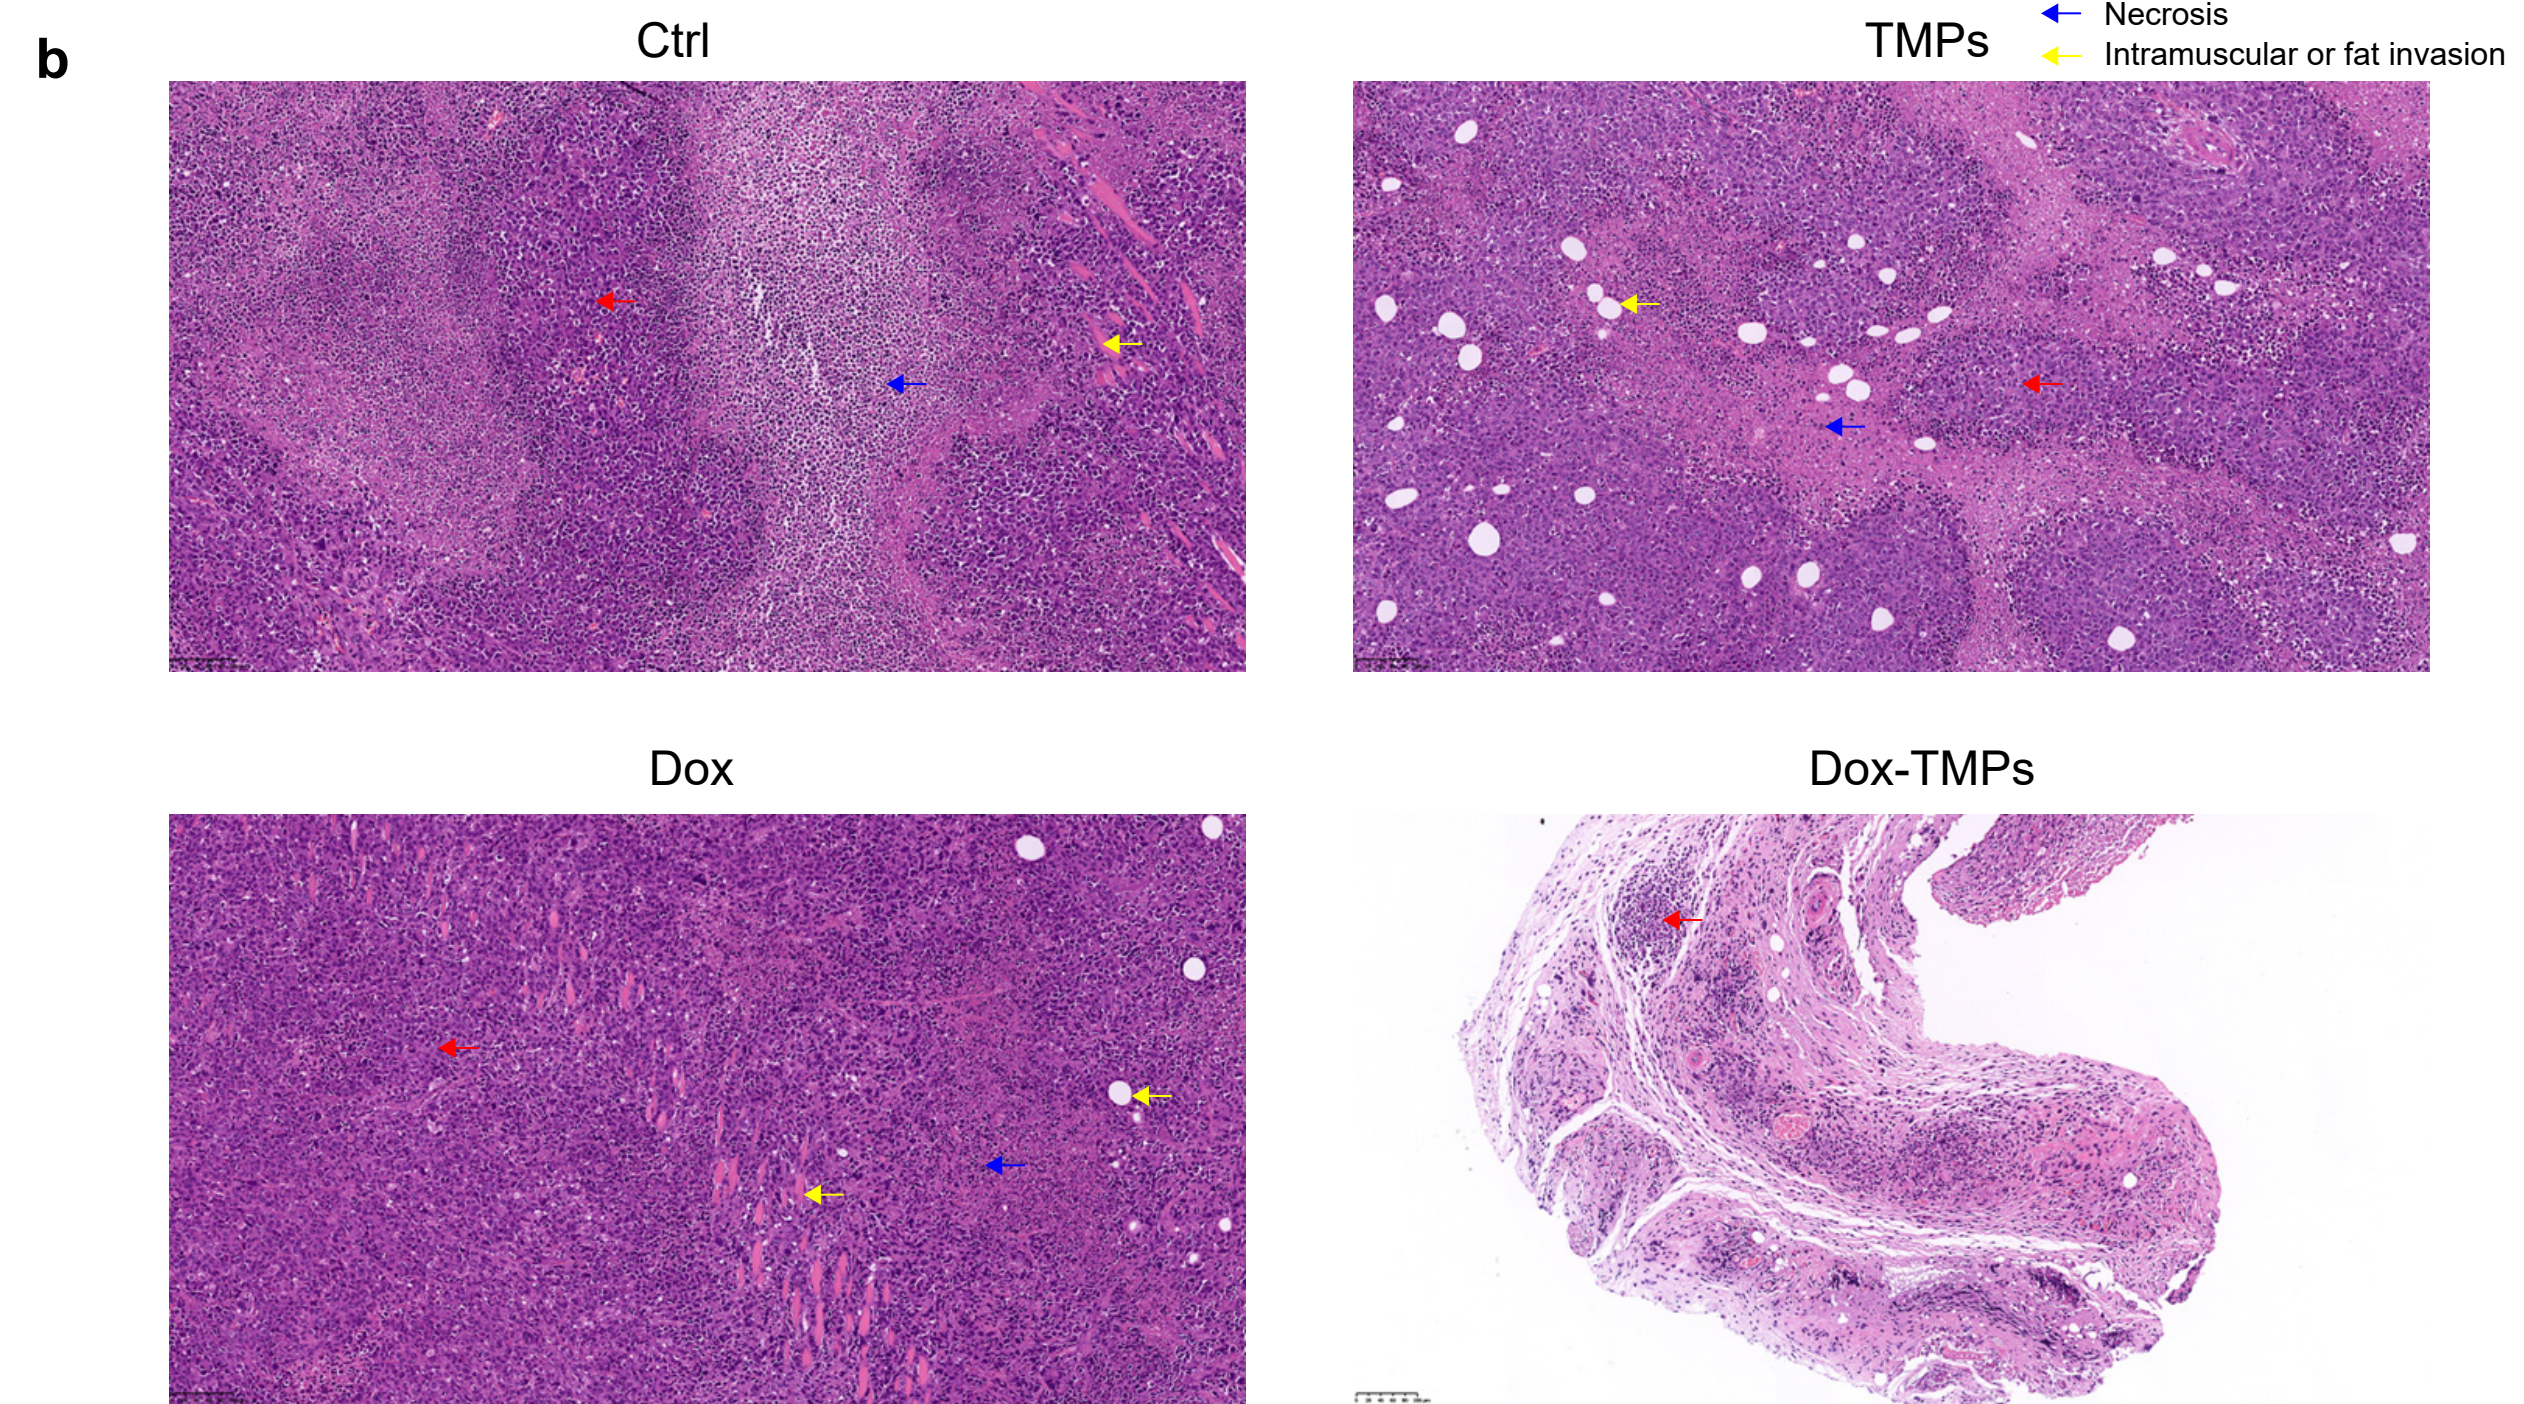

**Supplementary Figure 1. a** Mice were re-injected subcutaneously on the opposite dorsal side with H22 cells after the removal of subcutaneous tumors on the right dorsal side. On the 14th day, the subcutaneous tumor status in different groups of mice was assessed. **b** After the removal of the second subcutaneous tumors in each group of mice, histological examination with H&E staining was conducted.
